# Supplementary material
Source: PubMed Central journal article supplement (PMC4292490)
Supplement: AEM.03206-14_zam999105995so1.pdf [file AEM.03206-14_zam999105995so1.pdf]

Supplementary Figure 1. Salinity of the water overlaying the oysters at the time of oyster collections, arranged by site; Hoop Pole Creek (HPC), Harlowe Creek (HC), South River (SR), North River (NR). Boxes represent 25<sup>th</sup>-75<sup>th</sup> percentile, whiskers are minimum and maximum, and the solid horizontal line represents the mean. Asterisks represent means significantly different from the others (\*\* =  $p < 0.01$ , \*\*\* =  $p < 0.001$ ).

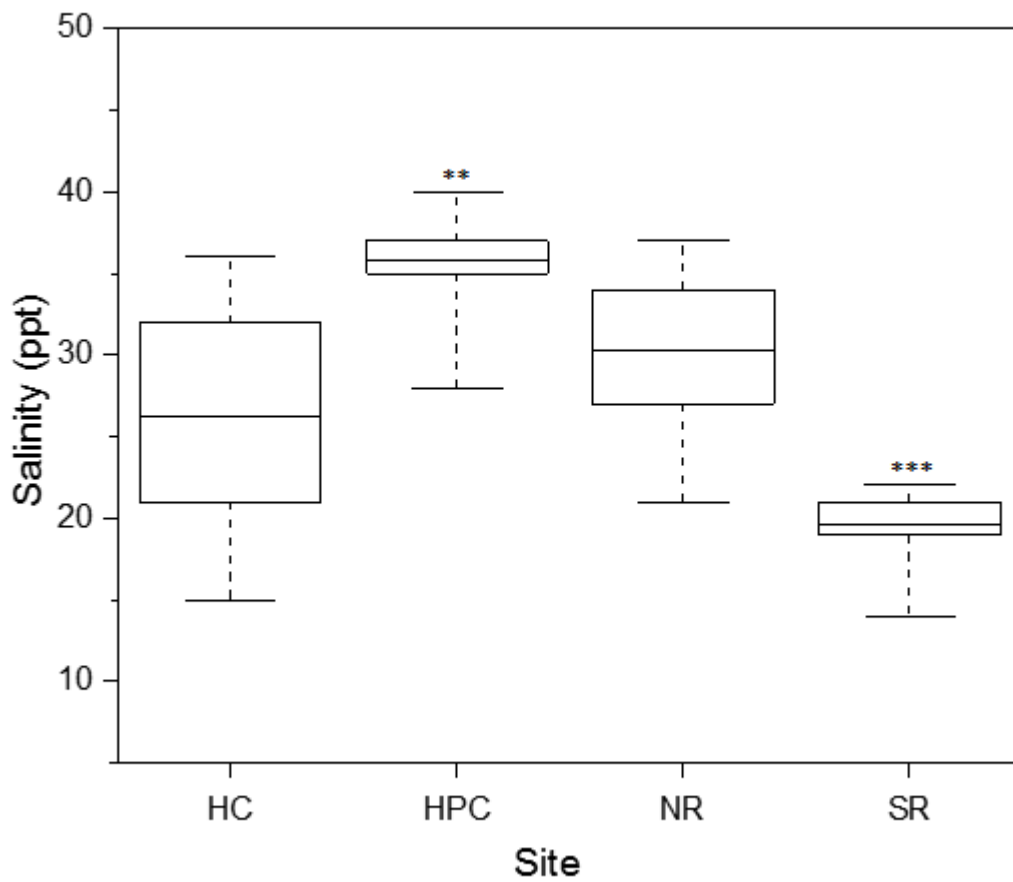

Supplementary Table 1. The minimum (Min), maximum (Max), and mean values of each listed parameter recorded at the time of oyster collection, arranged by sites Hoop Pole Creek (HPC), Harlowe Creek (HC), South River (SR), North River (NR) and the data for all sites combined (All Sites). Values below the limit of detection are listed with a “<”.

| Site      | Salinity (‰) |     |      | Water Temperature (°C) |      |      | 24 hour precipitation (cm) |     |      | Wind Velocity (kph) |      |      | Total <i>Vibrio</i> in water (cfu/ml) |     |      | Total <i>Vibrio</i> in oysters (cfu/g) |       |      |
|-----------|--------------|-----|------|------------------------|------|------|----------------------------|-----|------|---------------------|------|------|---------------------------------------|-----|------|----------------------------------------|-------|------|
|           | Min          | Max | Mean | Min                    | Max  | Mean | Min                        | Max | Mean | Min                 | Max  | Mean | Min                                   | Max | Mean | Min                                    | Max   | Mean |
| HPC       | 28           | 40  | 35.8 | 7.2                    | 27.2 | 18.9 | 0                          | 1.3 | 0.3  | 8.1                 | 32.2 | 19.2 | 0.6                                   | 170 | 40.5 | <10                                    | 34667 | 6940 |
| HC        | 15           | 36  | 26.2 | 7.2                    | 27.2 | 18.9 | 0                          | 1.3 | 0.3  | 8.1                 | 32.2 | 19.2 | 6                                     | 180 | 64.0 | 328                                    | 43847 | 8293 |
| SR        | 14           | 22  | 19.6 | 7.7                    | 29.2 | 19.7 | 0                          | 5.1 | 0.8  | 12.1                | 32.2 | 21.9 | 4                                     | 170 | 60.4 | 747                                    | 24049 | 7974 |
| NR        | 25           | 37  | 31   | 7.7                    | 26.9 | 19.3 | 0                          | 5.1 | 0.8  | 12.1                | 32.2 | 22.4 | 1.8                                   | 264 | 60.8 | 204                                    | 37838 | 9567 |
| All Sites | 14           | 40  | 27.8 | 7.2                    | 29.2 | 18.3 | 0                          | 5.1 | 0.6  | 8.1                 | 32.2 | 20.7 | 0.6                                   | 264 | 54.1 | <10                                    | 43847 | 7749 |

| Site      | <i>V. vulnificus</i> in water (cfu/ml) |     |      | <i>V. vulnificus</i> in oysters (cfu/g) |      |      | <i>V. parahaemolyticus</i> in water (cfu/ml) |     |      | <i>V. parahaemolyticus</i> in oysters (cfu/g) |      |      |
|-----------|----------------------------------------|-----|------|-----------------------------------------|------|------|----------------------------------------------|-----|------|-----------------------------------------------|------|------|
|           | Min                                    | Max | Mean | Min                                     | Max  | Mean | Min                                          | Max | Mean | Min                                           | Max  | Mean |
| HPC       | <0.1                                   | 6   | 0.5  | <10                                     | 147  | 14   | <0.1                                         | 16  | 3    | <10                                           | 2472 | 264  |
| HC        | <0.1                                   | 256 | 28   | <10                                     | 2905 | 309  | <0.1                                         | 88  | 13   | <10                                           | 2479 | 419  |
| SR        | <0.1                                   | 332 | 46   | <10                                     | 5740 | 1541 | <0.1                                         | 8.8 | 2.4  | <10                                           | 1761 | 318  |
| NR        | <0.1                                   | 16  | 3.5  | <10                                     | 268  | 49   | <0.1                                         | 22  | 5    | <10                                           | 913  | 170  |
| All Sites | <0.1                                   | 332 | 191  | <10                                     | 5740 | 154  | <0.1                                         | 88  | 5.4  | <10                                           | 2479 | 277  |

Supplementary Table 1. The minimum (Min), maximum (Max), and mean values of each listed parameter recorded at the time of oyster collection, arranged by sites Hoop Pole Creek (HPC), Harlowe Creek (HC), South River (SR), North River (NR) and the data for all sites combined (All Sites). Values below the limit of detection are listed with a “<”.
